# Supplementary material for: Alterations of Epigenetic Signatures in Hepatocyte Nuclear Factor 4α Deficient Mouse Liver Determined by Improved ChIP-qPCR and (h)MeDIP-qPCR Assays
Source: PubMed Central journal article supplement (PMC3888413; doi:10.1371/journal.pone.0084925), 2014-01-10
Supplement: pone.0084925.s001.pdf [file pone.0084925.s001.pdf]

**Table S1.** The efficiency (E) and coefficient of variation (CV) for C<sub>q</sub> values in real-time PCR reactions in the presence/absence of input DNA sample and positive control.

| <b>Positive control (fg)</b>             |      |      |      |      |      |      |      |      |      |      |      |      |
|------------------------------------------|------|------|------|------|------|------|------|------|------|------|------|------|
|                                          | 0    |      |      | 1    |      |      | 10   |      |      | 100  |      |      |
| Input <sup>a</sup> (dilution fold)       | 2.5  | 50   | 500  | 2.5  | 50   | 500  | 2.5  | 50   | 500  | 2.5  | 50   | 500  |
| CV (n=5)                                 | 0.68 | 0.77 | 1.45 | 1    | 1.12 | 0.78 | 1.12 | 0.78 | 1.03 | 0.78 | 1.03 | 1.18 |
| E                                        | 1.96 |      |      | 1.92 |      |      | 1.95 |      |      | 1.91 |      |      |
| <b>Input<sup>a</sup> (dilution fold)</b> |      |      |      |      |      |      |      |      |      |      |      |      |
|                                          | 0    |      |      | 2.5  |      |      | 50   |      |      | 500  |      |      |
| Positive control (fg)                    | 1    | 10   | 100  | 1    | 10   | 100  | 1    | 10   | 100  | 1    | 10   | 100  |
| CV (n=5)                                 | 1.26 | 1.28 | 1.86 | 1.15 | 0.21 | 0.77 | 1.1  | 1.15 | 0.54 | 0.5  | 0.82 | 0.4  |
| E                                        | 1.9  |      |      | 1.91 |      |      | 1.9  |      |      | 1.94 |      |      |

<sup>a</sup>Primers for Ugt2b36 promoter were used to determine potential interferences between the positive control and target genes in RT-PCR.

**Table S2.** The list of functions of genes tested in histone modifications due to *Hnf4a* deficiency.

| <b>Abbreviation</b>                                        | <b>Full name</b>                                                                                    | <b>Main function</b>                                                                                                                     |
|------------------------------------------------------------|-----------------------------------------------------------------------------------------------------|------------------------------------------------------------------------------------------------------------------------------------------|
| <i>Defb1</i>                                               | Defensin beta 1                                                                                     | Antimicrobial activity, tumor suppresser, cellular differentiation <sup>2</sup>                                                          |
| <i>Gadd45β</i>                                             | Growth arrest and DNA damage-inducible protein 45β                                                  | Activity-induced regulation of gene expression and DNA demethylation <sup>3,4</sup>                                                      |
| <i>Cyp2c44, Cyp3a11, Sult1b1, Sult1e1, Ugt2b1, Ugt2b36</i> | Cytochrome P450 2c44 and 3a11 Sulfotransferase 1b1 and 1e1 UDP glucuronosyltransferase 2b1 and 2b36 | Phase I and II drug processing enzymes <sup>5,6</sup>                                                                                    |
| <i>Asgr1</i>                                               | Asialoglycoprotein receptor 1                                                                       | Clearance of glycoprotein and IgA, removal of apoptotic cells and low density lipoprotein, disposal of cellular fibronectin <sup>7</sup> |
| <i>Gas2</i>                                                | Growth arrest specific 2                                                                            | Regulates microfilament and cell shape changes during apoptosis <sup>8</sup>                                                             |
| <i>Pdzk1</i>                                               | PDZ domain-containing 1                                                                             | An adaptor primarily acting in the formation of diverse molecular complexes with its PDZ domains <sup>9</sup>                            |
| <i>Perp</i>                                                | P53 apoptosis effector related to PMP-22                                                            | The role in the epithelial integrity of a number of tissues <sup>10</sup>                                                                |
| <i>Celsr1</i>                                              | Cadherin, EGF LAG seven-pass G-type receptor                                                        | An atypical proto-cadherin that is involved in the regulation of several biological processes <sup>11</sup>                              |
| <i>Lifr</i>                                                | leukemia inhibitory factor receptor                                                                 | A pleiotropic cytokine present in both soluble and matrix-bound forms <sup>12</sup>                                                      |
| <i>Ppara</i>                                               | Peroxisome proliferator-activated receptor α                                                        | Mediates the biological and toxicological effects of peroxisome proliferators <sup>13</sup>                                              |

**Table S3.** List of qPCR primers used for IPed DNA fragments and cDNA.

| Primers for IPed DNA fragments |                             |              |    |
|--------------------------------|-----------------------------|--------------|----|
| Gene                           | Sequence <sup>a</sup>       | Product (bp) | Tm |
| <i>Rgl3</i> _intron 2-3        | CAATTATACCCATCTCTGGCAC      | 136          | 60 |
|                                | AGTGCTAGAGTAGTGGGGTGTC      |              |    |
| <i>Sox9</i> _exon3             | CCTACAGCCCCTTCAACCTTCCTC    | 114          | 68 |
|                                | CGGCTGCGTGACTGTAGTAGGAG     |              |    |
| <i>Zbp1</i> _exon1             | CAGGTCCAAGCAGCCATTCTTGCC    | 134          | 68 |
|                                | CTCAAGTCAACAGGAGCTTCTGCCAT  |              |    |
| <i>Casp9</i> _pro              | TTTATGGAAGGAAATGTTGACTGA    | 111          | 60 |
|                                | TGACCAGAACCAGAATAGACTC      |              |    |
| <i>Slc10a1</i> _pro            | GTAAAGAATGAACCCTGTGCTG      | 159          | 60 |
|                                | GCTGTGGGCAAATAAAGATTATG     |              |    |
| <i>Slc10a1</i> _exon1          | ATGGAGGGCGCACACGATC         | 231          | 60 |
|                                | GAAAGCACTGAGGGGCATGAT       |              |    |
| <i>Slc47a1</i> -exon1_2        | ACATGGAACGCACGGAGGAGT       | 131          | 60 |
|                                | ACCCGCCAGGACCAAGAGT         |              |    |
| <i>Slc47a1</i> -exon1          | TGAGTCCAAGGTTGCAGATCC       | 149          | 60 |
|                                | ACTCCTCCGTGCGTTCCATGT       |              |    |
| <i>Slc22a6</i> _exon1          | CATCAGGACAAAGATTAACGCT      | 246          | 60 |
|                                | TGCCCTTTGCCTGAGGAGTA        |              |    |
| <i>Mgst3</i> _intron1-2        | TTGTGCAGCAAACAGTTTACCT      | 173          | 60 |
|                                | TGTGGAAGAAAGTACAACACAG      |              |    |
| <i>Slc15a2</i> _pro            | GGTATTTTTCTCAAACAGATAACC    | 154          | 60 |
|                                | AGCAGAACTTGAAGCTATAGGAA     |              |    |
| <i>Sult2a1</i> _Exon2          | AGATTGTATGCTTGATTGAGACC     | 117          | 60 |
|                                | CCTTATTGATTAATGCAGAATATCC   |              |    |
| <i>Gtf2h2</i> _pro             | TTACGCTCTTGGGCACCACTT       | 139          | 60 |
|                                | AAGTACCGGCAGTCTGAGTG        |              |    |
| <i>Gapdh</i> _pro              | GACTCCTCGTCCTTAAGTTCAT      | 166          | 60 |
|                                | TCTCTTTGGACCCGCCTCATT       |              |    |
| <i>Defb1</i> _pro              | CACAGGACTTGGACTCTACTC       | 144          | 60 |
|                                | GATGAGGCTTGAATGAGCTTGT      |              |    |
| <i>Gadd45b</i> _pro            | ACATCCCTTCTTTCAGAGCTTG      | 161          | 60 |
|                                | AGAAGTTTCTCTCCTGATTCC       |              |    |
| <i>Sult1e1</i> _pro            | GGTTAAAGGTAGAAAGGAGAAATG    | 173          | 60 |
|                                | CATCTACACAGTAAATGCAATAGT    |              |    |
| <i>Asgr1</i> _pro              | CAAGTATTGAACATGCGGAAGTG     | 152          | 60 |
|                                | TAGACTTGGAAGTGGGGAGGT       |              |    |
| <i>Cyp2C44</i> _pro            | GGAGCGAGAACCAACATCCAA       | 133          | 60 |
|                                | TTCCTTGTACTIONCAGAAATCCATAA |              |    |
| <i>Cyp3a11</i> _pro            | GCCTTGGTGAGAGGGTATTTG       | 153          | 60 |
|                                | GCAGTTCGTATAGTTCATCCAC      |              |    |

|                      |                            |     |    |
|----------------------|----------------------------|-----|----|
| <i>Gas2_pro</i>      | TCTTCTATTTGTAATGAACACTGG   | 114 | 60 |
|                      | GCACAATGTTAAAATTGGGTGTTG   |     |    |
| <i>Pdzk1_pro</i>     | GGCGGGGCTTGATTTTACTGA      | 118 | 60 |
|                      | GATGTATTTAACAGGGACGTGTG    |     |    |
| <i>Perp_pro</i>      | CTGAACCACCAGAGCACAGA       | 100 | 60 |
|                      | GCTTCCACAGGCAGATCCTA       |     |    |
| <i>Sult1b1_pro</i>   | CTTGTGTGCTGTTTTGTCTTGC     | 123 | 60 |
|                      | TCAACAGTTGTAATAGGTCAGAG    |     |    |
| <i>Ugt2b1_pro</i>    | CCATGCAACTCAAGAAGAAGG      | 150 | 60 |
|                      | CAAGGTTACGAAGTTTGTCTTT     |     |    |
| <i>Celsr1_pro</i>    | CGCGGCCCCCGGTGTCCTC        | 124 | 69 |
|                      | CCGGCGCACCTCCGCATCCAC      |     |    |
| <i>Lifr_pro</i>      | CAAAGTGCAATGACAGCGGTTTGGGA | 171 | 68 |
|                      | AGGGAGGTGCCTCTGCCGAGAC     |     |    |
| <i>Ppara_pro</i>     | CATGTGGACTCTGATCTTTGGA     | 151 | 60 |
|                      | GTATATAACAGTGAGCAAGAATGG   |     |    |
| <i>Ugt2b36_pro</i>   | CATGATTTTCCACCAACACAGTA    | 120 | 60 |
|                      | GTAATCCATCTGTCACTGCTTG     |     |    |
| <i>Cyp2c44_exon1</i> | TTGCTCTCCTGGTTTTGGTGA      | 105 | 60 |
|                      | CAATAATGGGAAGTGGAGTGG      |     |    |
| <i>Cyp2c44_exon2</i> | CGTGGTCCTACATGGCTATGA      | 110 | 60 |
|                      | CATGTCCCTTCTGGCTATCTT      |     |    |
| <i>Sult1b1_exon1</i> | GCTTTGCTTAGATCCTTATTGAAC   | 121 | 60 |
|                      | CTTCAATCAGAACGAATGCTGC     |     |    |
| <i>Sult1b1_exon2</i> | GAGTGCCTCAGAAGACGTTTTG     | 136 | 60 |
|                      | GTAAGTGGTTATTACAATGTCACCT  |     |    |
| <i>Sult1e1_exon2</i> | ATGAAGTTTTTGGAGAGTTCCGT    | 116 | 60 |
|                      | AGGATATGTAGCAATGACAAGGT    |     |    |
| <i>Ugt2b1_exon1</i>  | CCTACAGAATACAGCCATTGG      | 105 | 60 |
|                      | AATGAGGATGGAAGCAGAAGATA    |     |    |
| <i>Ugt2b1_exon2</i>  | TAAGTGAATGATGGGGAAGG       | 120 | 60 |
|                      | TGGCTGGTTTACAATGGAGTC      |     |    |

| Primers for cDNA |                         |              |    |
|------------------|-------------------------|--------------|----|
| Gene             | Sequence <sup>a</sup>   | Product (bp) | Tm |
| <i>Defb1</i>     | AGGTGTTGGCATTCTCACAAAGT | 134          | 60 |
|                  | TGGGCTTATCTGGTTTACAGG   |              |    |
| <i>Gadd45b</i>   | TTCACTTCACCCTGATCCAGT   | 227          | 60 |
|                  | ATTGCCTCTGCTCTCTTCAACA  |              |    |
| <i>Sult1e1</i>   | TCCGTATGGTTCCTGGTATGA   | 176          | 60 |
|                  | GTTGAACGATTCTGTCCACAAG  |              |    |
| <i>Asgr1</i>     | GATCACATCCCAAATTCCTCAA  | 157          | 60 |
|                  | TTCCAGCTTCGACTCCACTAA   |              |    |
| <i>Cyp2c44</i>   | CCCACTCCACTTCCCATTATT   | 159          | 60 |
|                  | TTCTTCACCACATCATAGCC    |              |    |

|                |                         |     |    |
|----------------|-------------------------|-----|----|
| <i>Cyp3a11</i> | ACAAACAAGCAGGGATGGAC    | 84  | 60 |
|                | GGTAGAGGAGACCAAGCTG     |     |    |
| <i>Gas2</i>    | AACAAGCATGTGATGGTCCGA   | 193 | 60 |
|                | TAGCCTTGTAGGTGGCAGAGA   |     |    |
| <i>Slc47a1</i> | GAATTCCGCTGTCTCTCACGA   | 237 | 60 |
|                | ACTAAAATCCCACCCACCAAG   |     |    |
| <i>Slc10a1</i> | CTTCCAGCAAACCTTCAACAG   | 169 | 60 |
|                | ACCTTGAGTCTCTGAGCATTG   |     |    |
| <i>Pdzk1</i>   | CACGTCACTCTGTTGGTCTGT   | 174 | 60 |
|                | TGTGCTGAGAGTTCGGTCTTT   |     |    |
| <i>Perp</i>    | GCCATATTCCAGATCATCTCC   | 160 | 60 |
|                | AGCAGAAGAAGAAGGAAC      |     |    |
| <i>Sult1b1</i> | CCCTAAATCAGGTACTACTTG   | 229 | 60 |
|                | GTTCTCCAGAAGGATTTTGG    |     |    |
| <i>Ugt2b1</i>  | GTTTGATGTCGTTCTAGCAGAT  | 166 | 60 |
|                | TGACAGAACCACAGGCACATA   |     |    |
| <i>Celsr1</i>  | GCTGCTGTCCCTCTTTGTAG    | 119 | 60 |
|                | AAGTCACGTTCCAGGATGTTGG  |     |    |
| <i>Lifr</i>    | TGTGGTGACCAAGGAAAACCTC  | 121 | 60 |
|                | CTTAATCCATTCTCGCTTCCG   |     |    |
| <i>Ppara</i>   | ATGAAGAGGGCTGAGCGTAG    | 194 | 60 |
|                | AAACGCAACGTAGAGTGCTGT   |     |    |
| <i>Reg1</i>    | GCCAGGAAGCTGAAGAAGACC   | 172 | 60 |
|                | GCCTGACTGAGAACTGACACC   |     |    |
| <i>Ugt2b36</i> | TGTCATTTTGTGAGATGCTATTG | 120 | 60 |
|                | CCTCCACTGTATTTTTCAAGATA |     |    |
| <i>Gapdh</i>   | CAGCAAGGACACTGAGCAAGA   | 85  | 60 |
|                | GGGTCTGGGATGGAAATTGTG   |     |    |
| <i>Setd7</i>   | GAATTACACACCAAGAGGTTGAC | 171 | 60 |
|                | CATAGACGCAGTTCGGAGTGA   |     |    |
| <i>Kmt2c</i>   | GCCAGGCATTTATTGAGTTGA   | 170 | 60 |
|                | AGGCTGTCTTATGGGGTCTGT   |     |    |
| <i>Wdr5</i>    | CAGTCTCAGCCGTTTCATTTCA  | 153 | 60 |
|                | GAGAGAACTTCACGAAGGACA   |     |    |
| <i>Ehmt2</i>   | CAAGGATGGCGAGGTTTACTG   | 153 | 60 |
|                | CTGGAGCTGAAGAAGGCAATG   |     |    |
| <i>Suv39h1</i> | GCCACGGCAGAATCTAAAATG   | 229 | 60 |
|                | TACCTCATTCTCCACGGTGAT   |     |    |
| <i>Ezh2</i>    | TTACTGCTGGCACCGTCTGA    | 195 | 60 |
|                | GGTTGCATCCACCACAAAATCA  |     |    |
| <i>Hdac3</i>   | GATGGCATTGATGACCAGAGT   | 156 | 60 |
|                | ATGTCCTCGAATGCTGAGATTG  |     |    |
| <i>Hdac6</i>   | AGAGTAGGCACAATCCCCAGT   | 166 | 60 |
|                | CCCACAACCTAGGTCCTCTTCA  |     |    |
|                |                         |     |    |

|                 |                         |     |    |
|-----------------|-------------------------|-----|----|
| <i>Dnmt1</i>    | GGACAGTGACACCCTTTTTGA   | 234 | 60 |
|                 | TCTTCCAGTTTCTCCACAGCA   |     |    |
| <i>Tet2</i>     | TCCCAACACGGAECTACAATG   | 133 | 60 |
|                 | GAATGGGCAGAACTGTAGCA    |     |    |
| <i>Tet3</i>     | TTACACTCACCTGGGATCTGG   | 174 | 60 |
|                 | AGTGTGTGTCTTCGGATCACC   |     |    |
| <i>Idh1</i>     | AGATGCAAGAAGATGAAATGACA | 180 | 60 |
|                 | TGACGCCACGTTGTATTTCT    |     |    |
| <i>Idh2</i>     | ATGGGAACCAGGACCTTATCA   | 181 | 60 |
|                 | TCCAGGTTGCTCTTAATGGTG   |     |    |
| <i>Idh3a</i>    | CCACAACACAAAACAGGTGAC   | 181 | 60 |
|                 | CTTTCCTCCTGGTCCTTGAAT   |     |    |
| <i>Hist1h1c</i> | GTTTCGTATTGGACTGCAAGGT  | 197 | 60 |
|                 | CTCCCAAACCTTCCAGGCTAAC  |     |    |
| <i>Hist1h1d</i> | CAAGAAGGTGAAGGCTGCTAA   | 160 | 60 |
|                 | AAAGCAGGACGCACCACTCTA   |     |    |
| <i>H3F3b</i>    | AGAGATCCGTCGTTACCAGAA   | 172 | 60 |
|                 | ATCTTCAAACAACCCACCAG    |     |    |

<sup>a</sup>Up: Forward; Down: Reverse

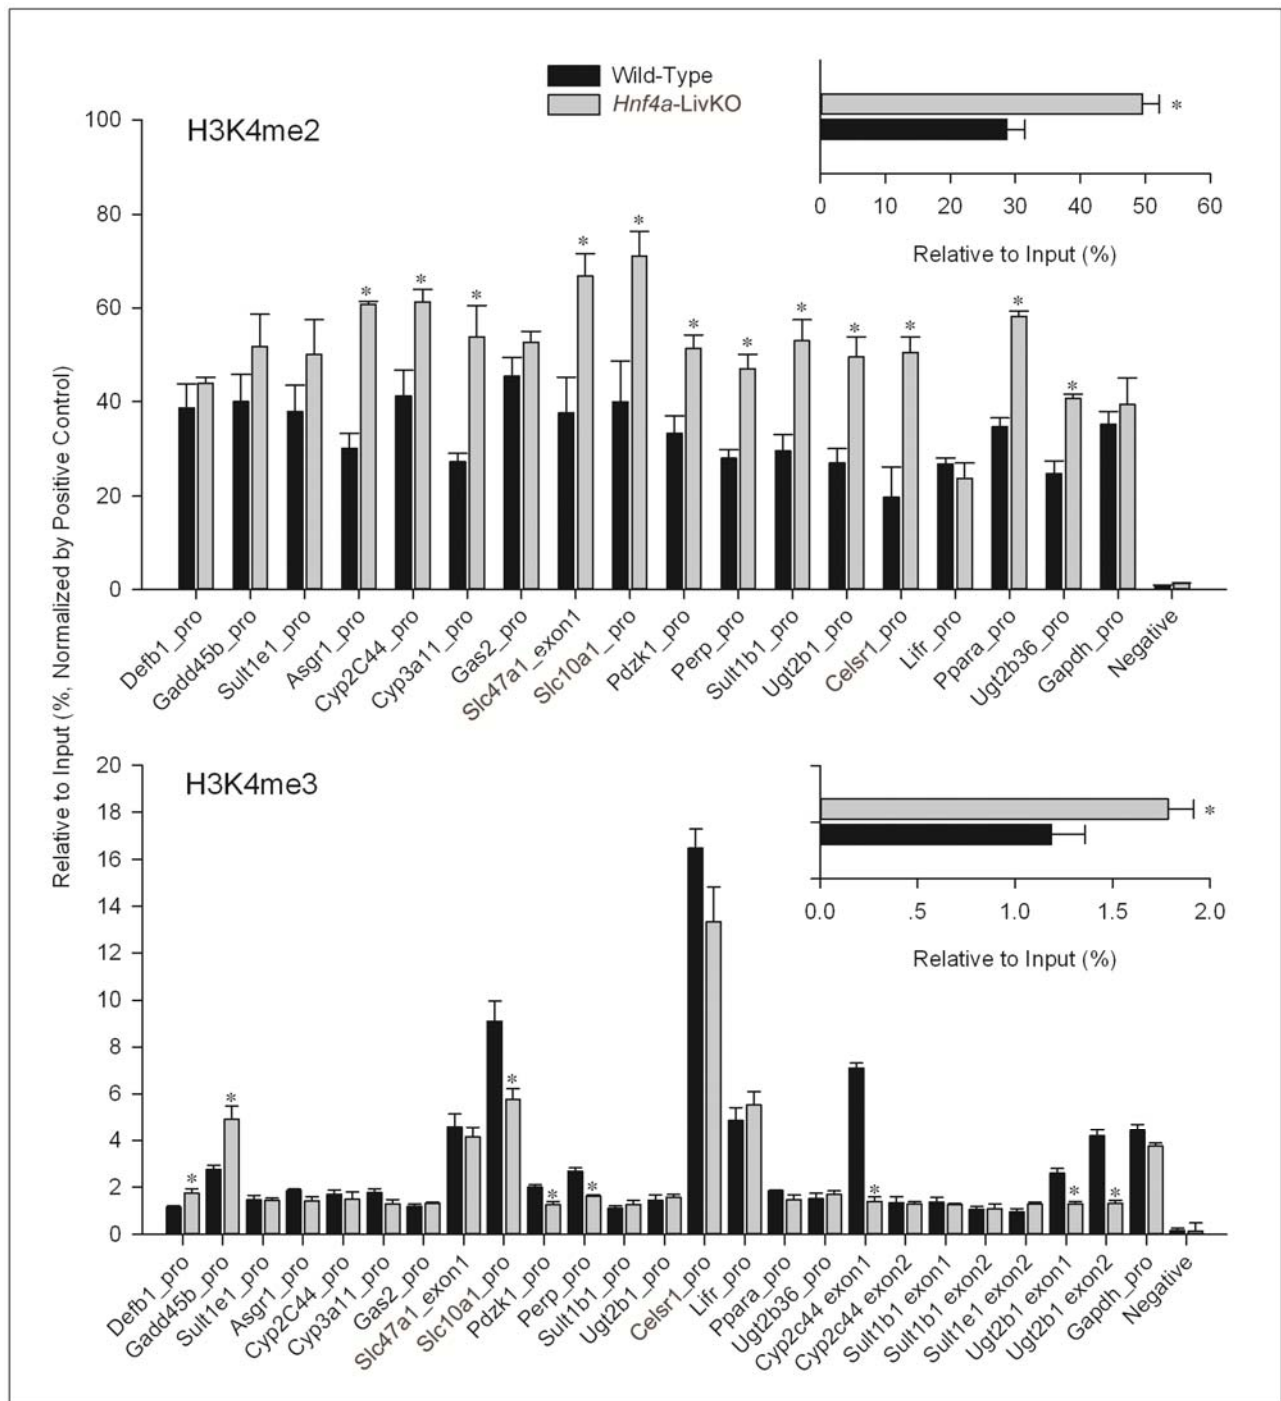

**Fig. S1.**

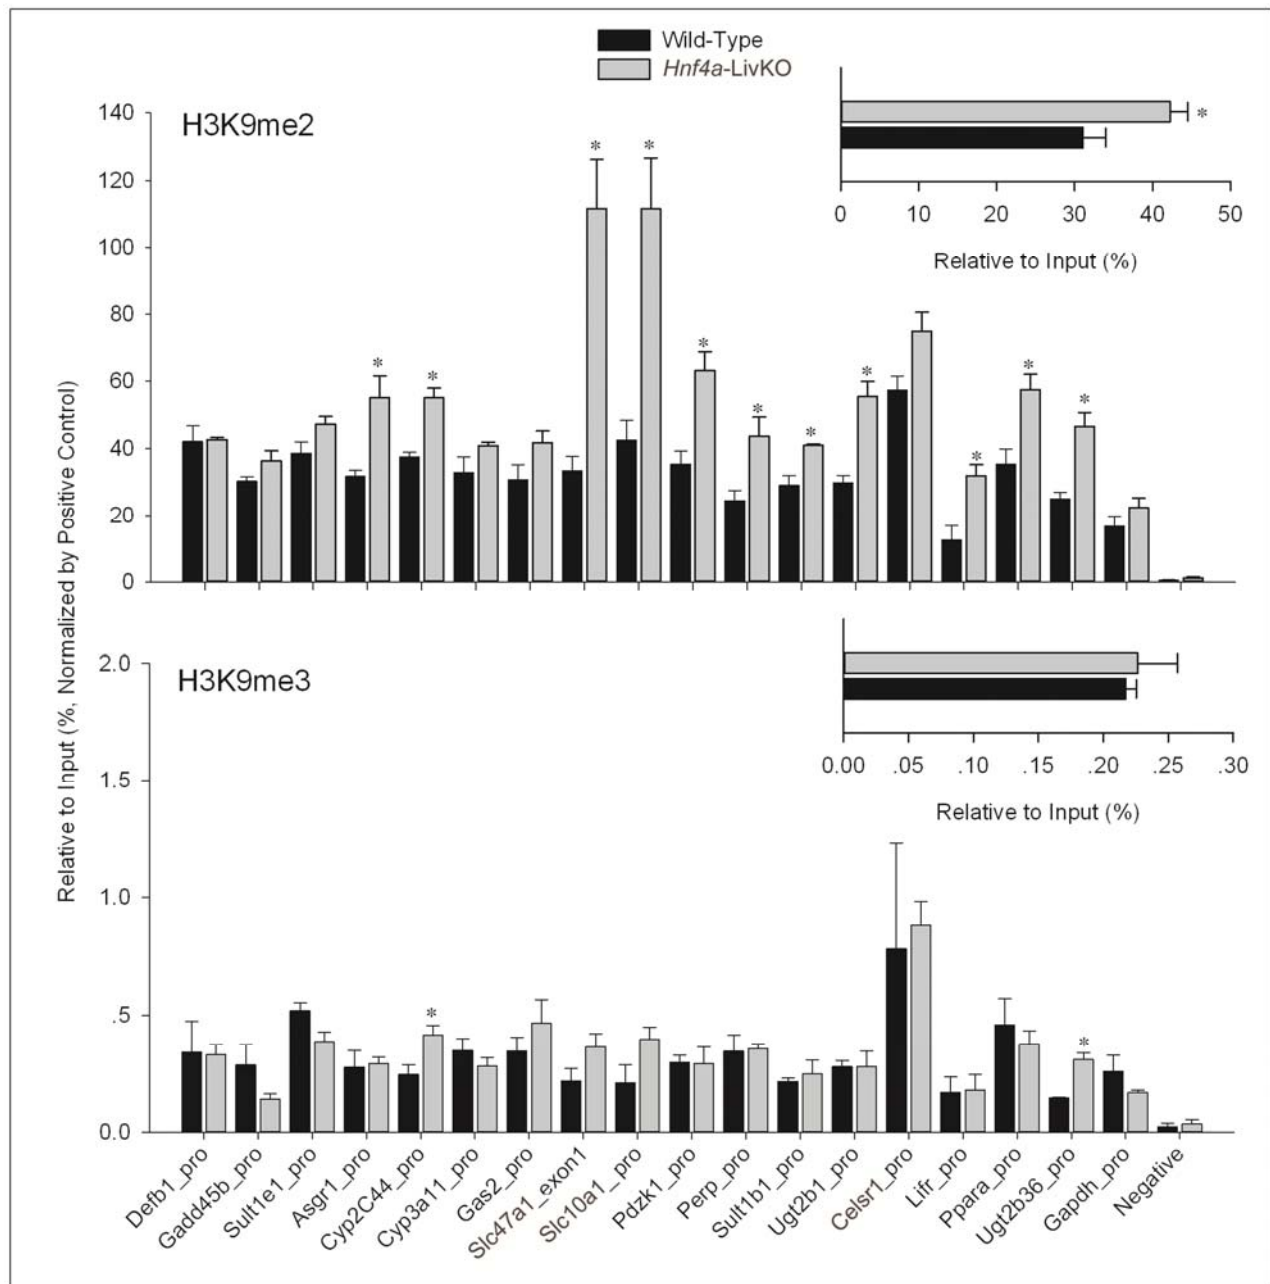

**Fig. S2.**



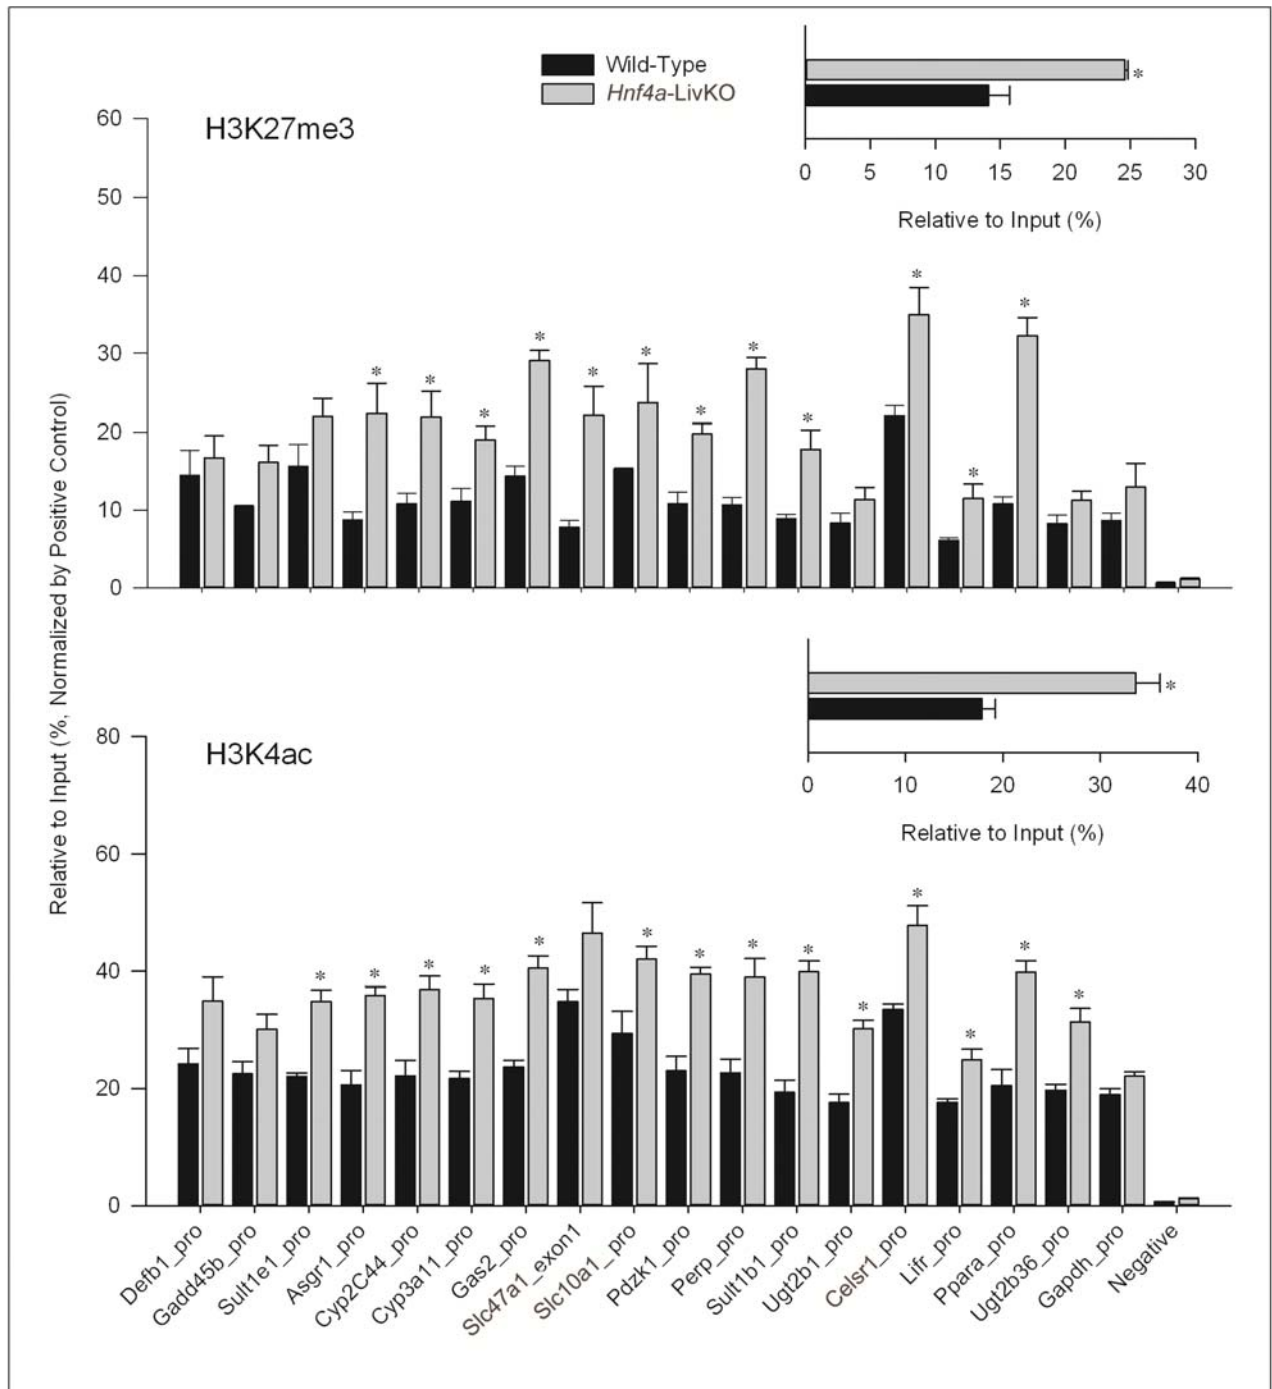

**Fig. S3.**

## References

1. Lu, H., Gunewardena, S., Cui, J. Y., Yoo, B., Zhong, X. B. & Klaassen, C. D. (2013). RNA-sequencing quantification of hepatic ontogeny and tissue distribution of mRNAs of phase II enzymes in mice. *Drug Metab Dispos.* **41**, 844-57.
2. Prado-Montes de Oca, E. (2010). Human beta-defensin 1: a restless warrior against allergies, infections and cancer. *Int J Biochem Cell Biol.* **42**, 800-4.
3. Chen, Z., Clark, S., Birkeland, M., Sung, C. M., Lago, A., Liu, R., Kirkpatrick, R., Johanson, K., Winkler, J. D. & Hu, E. (2002). Induction and superinduction of growth arrest and DNA damage gene 45 (GADD45) alpha and beta messenger RNAs by histone deacetylase inhibitors trichostatin A (TSA) and butyrate in SW620 human colon carcinoma cells. *Cancer Lett.* **188**, 127-40.
4. Gavin, D. P., Sharma, R. P., Chase, K. A., Matrisciano, F., Dong, E. & Guidotti, A. (2012). Growth arrest and DNA-damage-inducible, beta (GADD45b)-mediated DNA demethylation in major psychosis. *Neuropsychopharmacology.* **37**, 531-42.
5. Lu, H., Gonzalez, F. J. & Klaassen, C. (2010). Alterations in hepatic mRNA expression of phase II enzymes and xenobiotic transporters after targeted disruption of hepatocyte nuclear factor 4 alpha. *Toxicol Sci.* **118**, 380-90.
6. Elshenawy, O. H., Anwar-Mohamed, A., Abdelhamid, G. & El-Kadi, A. O. (2012). Murine atrial HL-1 cell line is a reliable model to study drug metabolizing enzymes in the heart. *Vascul Pharmacol.* **58**, 326-33
7. Rigopoulou, E. I., Roggenbuck, D., Smyk, D. S., Liaskos, C., Mytilinaiou, M. G., Feist, E., Conrad, K. & Bogdanos, D. P. (2012). Asialoglycoprotein receptor (ASGPR) as target autoantigen in liver autoimmunity: lost and found. *Autoimmun Rev.* **12**, 260-9.
8. Benetti, R., Del Sal, G., Monte, M., Paroni, G., Brancolini, C. & Schneider, C. (2001). The death substrate Gas2 binds m-calpain and increases susceptibility to p53-dependent apoptosis. *EMBO J.* **20**, 2702-14.
9. Kim, J. K., Kwon, O., Kim, J., Kim, E. K., Park, H. K., Lee, J. E., Kim, K. L., Choi, J. W., Lim, S., Seok, H., Lee-Kwon, W., Choi, J. H., Kang, B. H., Kim, S., Ryu, S. H. & Suh, P. G. (2012). PDZ domain-containing 1 (PDZK1) protein regulates phospholipase C-beta3 (PLC-beta3)-specific activation of somatostatin by forming a ternary complex with PLC-beta3 and somatostatin receptors. *J Biol Chem.* **287**, 21012-24.
10. Ihrie, R. A., Marques, M. R., Nguyen, B. T., Horner, J. S., Papazoglu, C., Bronson, R. T., Mills, A. A. & Attardi, L. D. (2005). Perp is a p63-regulated gene essential for epithelial integrity. *Cell.*

**120**, 843-56.

11. Carreira-Barbosa, F., Kajita, M., Morel, V., Wada, H., Okamoto, H., Martinez Arias, A., Fujita, Y., Wilson, S. W. & Tada, M. (2009). Flamingo regulates epiboly and convergence/extension movements through cell cohesive and signalling functions during zebrafish gastrulation. *Development* .**136**, 383-92.
12. Nogueira-Silva, C., Piairo, P., Carvalho-Dias, E., Peixoto, F. O., Moura, R. S. & Correia-Pinto, J. (2012). Leukemia inhibitory factor in rat fetal lung development: expression and functional studies. *PLoS One*. **7**, e30517.
13. Aoyama, T., Peters, J. M., Iritani, N., Nakajima, T., Furihata, K., Hashimoto, T. & Gonzalez, F. J. (1998). Altered constitutive expression of fatty acid-metabolizing enzymes in mice lacking the peroxisome proliferator-activated receptor alpha (PPARalpha). *J Biol Chem*. **273**, 5678-84.
